# Supplementary material for: High-temperature enantiomeric azobenzene-based photoisomerized piezoelectrics: 4-(phenyldiazenyl)anilinium) d- and l-tartrate
Source: Royal Society of Chemistry journal article supplement (doi:10.1039/d1qm01157j), 2021-01-01
Supplement: d1qm01157j1.pdf [file d1qm01157j1.pdf]

# High-Temperature Enantiomeric Azobenzene-Based Photoisomerized Piezoelectrics: 4- (Phenyldiazenyl)anilinium) *D*- and *L*-Tartrate

*Xin Mu, Lei Xu, Yi-Yi Xu, Han-Yue Zhang\* and Ren-Gen Xiong*

Jiangsu Key Laboratory for Science and Applications of Molecular Ferroelectrics, Southeast University, Nanjing 211189, P.R. China.

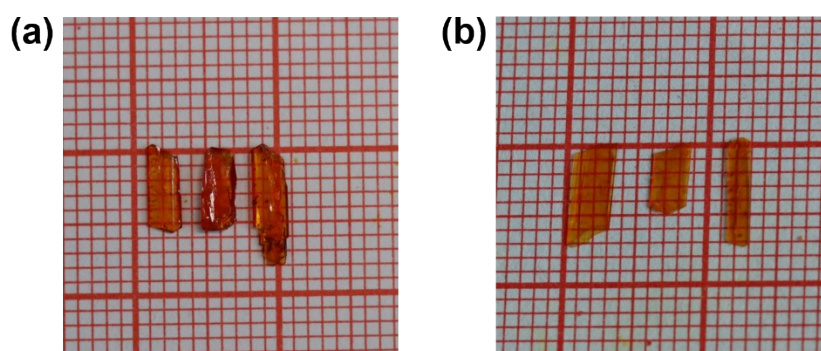

Figure S1. The crystal morphologies and sizes of (a) *D*-1 and (b) *L*-1.

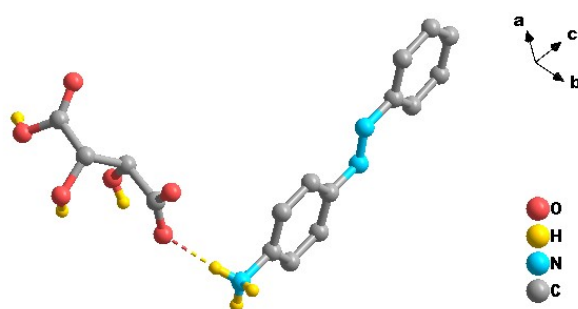

Figure S2. The basic unit of *rac*-1.

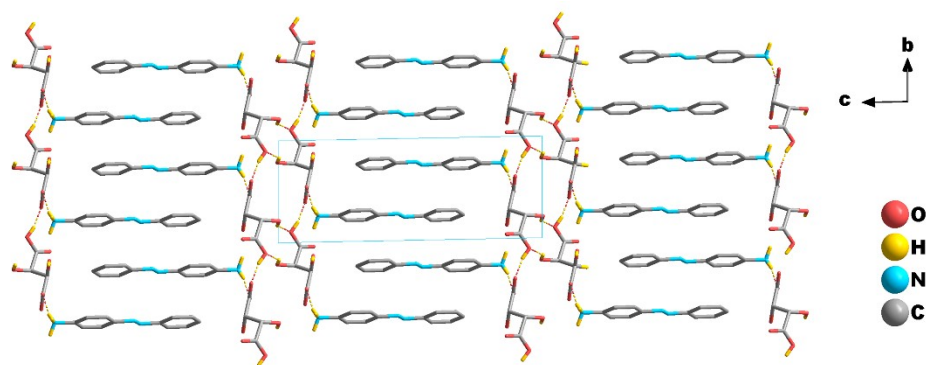

Figure S3. Packing views of *rac*-1 along the *a*-axis at 273 K.

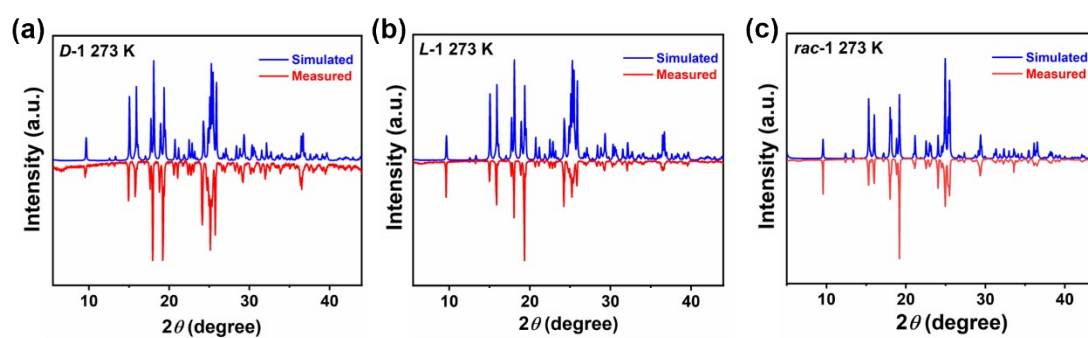

Figure S4. Experimental PXRD patterns and simulated ones from crystal structures of (a) *D*-1, (b) *L*-1, and (c) *rac*-1 at 273K.

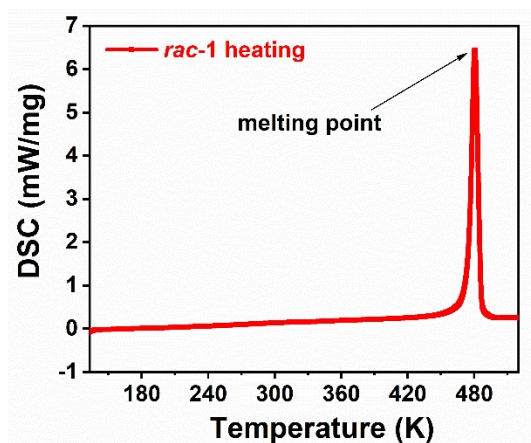

Figure S5. DSC curves of *rac*-1 in the heating mode.

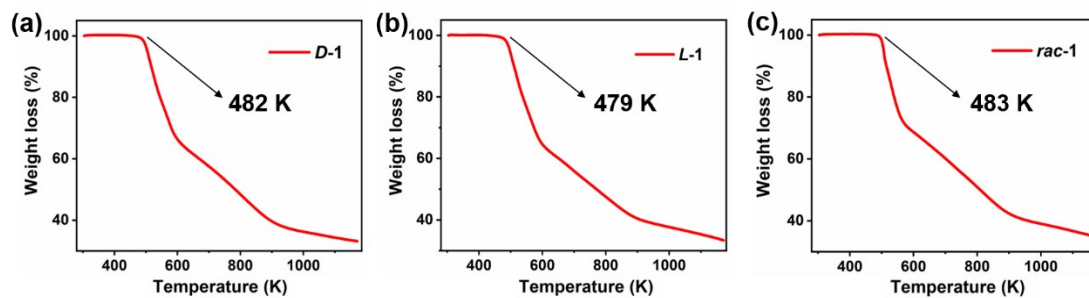

Figure S6. TGA curves of (a) *D-1*, (b) *L-1*, and (c) *rac-1* in the temperature range of 280 K to 1180 K.

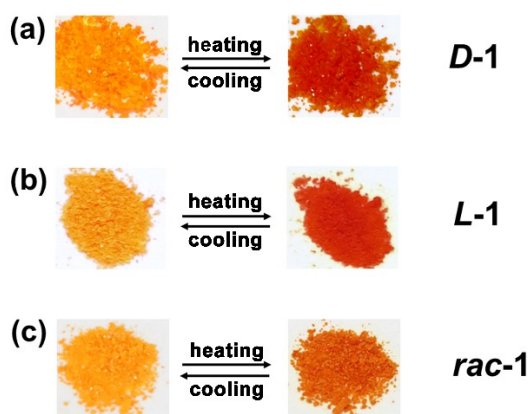

Figure S7. The color changes of the powder samples of (a) *D-1*, (b) *L-1*, and (c) *rac-1* before and after the heating process.

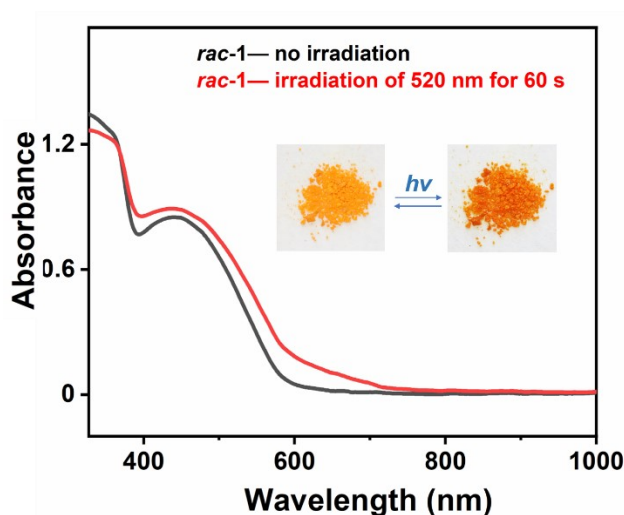

Figure S8. Solid-state UV-vis absorption spectra of *rac-1* at 293 K before and after the irradiation of 520 nm for 60 s. (Insets: color changes of the powder samples before and after the irradiation).

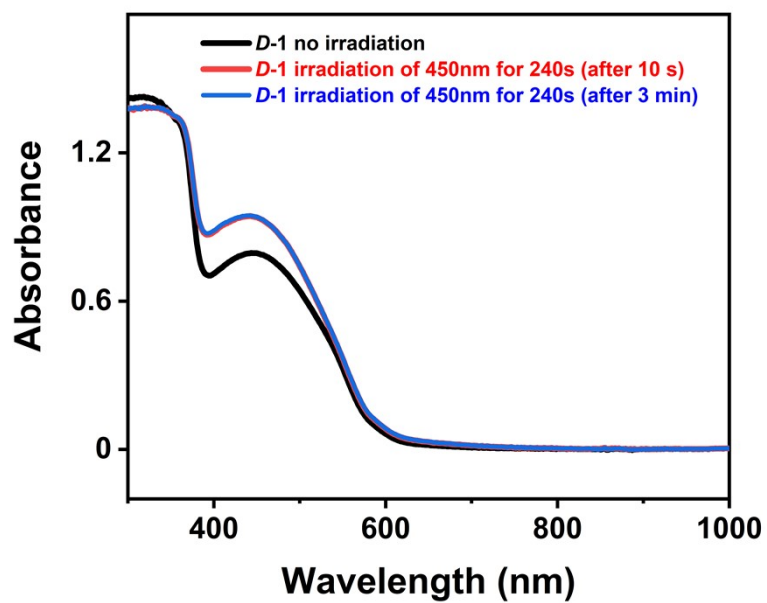

Figure S9. Solid-state UV-vis absorption spectra of *D-1* after 450 nm irradiation for 240 s recorded at 10 s and 3 minutes.

Table S1. Crystal data for *D*-1, *L*-1 and *rac*-1 at 273 K, respectively.

| Compound                                              | <i>D</i> -1                                                     | <i>L</i> -1                                                     | <i>rac</i> -1                                                 |
|-------------------------------------------------------|-----------------------------------------------------------------|-----------------------------------------------------------------|---------------------------------------------------------------|
| Temperature                                           | 273K                                                            |                                                                 |                                                               |
| Formula                                               | C <sub>64</sub> H <sub>68</sub> N <sub>12</sub> O <sub>24</sub> | C <sub>64</sub> H <sub>68</sub> N <sub>12</sub> O <sub>24</sub> | C <sub>16</sub> H <sub>17</sub> N <sub>3</sub> O <sub>6</sub> |
| Formula weight                                        | 1389.30                                                         | 1389.30                                                         | 347.32                                                        |
| Crystal system                                        | triclinic                                                       | triclinic                                                       | triclinic                                                     |
| Space group                                           | <i>P</i> 1                                                      | <i>P</i> 1                                                      | <i>P</i> $\bar{1}$                                            |
| <i>a</i> , <i>b</i> , <i>c</i> (Å)                    | 7.41810(10)                                                     | 7.41880(10)                                                     | 6.0753(4)                                                     |
|                                                       | 12.2977(2)                                                      | 12.2962(2)                                                      | 7.4995(5)                                                     |
|                                                       | 19.2802(3)                                                      | 19.2868(4)                                                      | 18.4956(8)                                                    |
|                                                       | 103.6720(10)                                                    | 103.691(10)                                                     | 90.993(4)                                                     |
| $\alpha$ , $\beta$ , $\gamma$ (°)                     | 97.1770(10)                                                     | 97.174(10)                                                      | 90.184(4)                                                     |
|                                                       | 106.8510(10)                                                    | 106.8560(10)                                                    | 108.846(6)                                                    |
| Volume / (Å <sup>3</sup> )                            | 1599.84(4)                                                      | 1600.15(5)                                                      | 801.99(8)                                                     |
| Z                                                     | 1                                                               | 1                                                               | 2                                                             |
| F (000)                                               | 728.0                                                           | 728.0                                                           | 364.0                                                         |
| Radiation $\lambda$ (Cu K $\alpha$ ) (Å)              | 1.54184                                                         | 1.54184                                                         | 1.54184                                                       |
| 2 Theta range (°)                                     | 4.822 to 151.986                                                | 7.844 to 152.084                                                | 4.778 to 164.956                                              |
|                                                       | -9 ≤ <i>h</i> ≤ 9                                               | -9 ≤ <i>h</i> ≤ 9                                               | -7 ≤ <i>h</i> ≤ 7                                             |
| Limiting indices                                      | -15 ≤ <i>k</i> ≤ 12                                             | -15 ≤ <i>k</i> ≤ 14                                             | -9 ≤ <i>k</i> ≤ 9                                             |
|                                                       | -23 ≤ <i>l</i> ≤ 23                                             | -23 ≤ <i>l</i> ≤ 24                                             | -23 ≤ <i>l</i> ≤ 18                                           |
| Reflections collected                                 | 20397                                                           | 17820                                                           | 7086                                                          |
| Data/restraints/parameter                             | 8744/3/923                                                      | 7811/3/916                                                      | 3088/0/230                                                    |
| GOF                                                   | 1.148                                                           | 1.526                                                           | 1.070                                                         |
| Final R indices [ <i>I</i> > 2 $\sigma$ ( <i>I</i> )] | R <sub>1</sub> = 0.0408                                         | R <sub>1</sub> = 0.0476                                         | R <sub>1</sub> = 0.0761                                       |
|                                                       | wR <sub>2</sub> = 0.1356                                        | wR <sub>2</sub> = 0.1707                                        | wR <sub>2</sub> = 0.2129                                      |
| R indices (all data)                                  | R <sub>1</sub> = 0.0437                                         | R <sub>1</sub> = 0.0493                                         | R <sub>1</sub> = 0.0852                                       |
|                                                       | wR <sub>2</sub> = 0.1391                                        | wR <sub>2</sub> = 0.1725                                        | wR <sub>2</sub> = 0.2326                                      |
| Largest diff peak and hole, e/<br>Å <sup>-3</sup>     | 0.17/-0.21                                                      | 0.28/-0.26                                                      | 0.64/-0.49                                                    |
| Flack parameter                                       | 0.00(9)                                                         | 0.11(8)                                                         |                                                               |
| CCDC number                                           | 2102666                                                         | 2102665                                                         | 2102663                                                       |

Table S2. Crystal data for *D*-1, *L*-1 and *rac*-1 at 323 K, respectively.

| Compound                                                | <i>D</i> -1                                                            | <i>L</i> -1                                                            |
|---------------------------------------------------------|------------------------------------------------------------------------|------------------------------------------------------------------------|
| Temperature                                             | 323K                                                                   |                                                                        |
| Formula                                                 | C <sub>32</sub> H <sub>34</sub> N <sub>6</sub> O <sub>12</sub>         | C <sub>32</sub> H <sub>34</sub> N <sub>6</sub> O <sub>12</sub>         |
| Formula weight                                          | 694.65                                                                 | 694.65                                                                 |
| Crystal system                                          | triclinic                                                              | triclinic                                                              |
| Space group                                             | <i>P</i> 1                                                             | <i>P</i> 1                                                             |
| <i>a</i> , <i>b</i> , <i>c</i> (Å)                      | 7.41960(10)<br>6.21250(10)<br>18.4272(2)                               | 7.41890(10)<br>6.21150(10)<br>18.42891(5)                              |
| $\alpha$ , $\beta$ , $\gamma$ (°)                       | 89.9300(10)<br>91.1130(10)<br>71.8020(10)                              | 89.944(2)<br>91.118(2)<br>71.795(2)                                    |
| Volume / (Å <sup>3</sup> )                              | 806.73(2)                                                              | 806.57(3)                                                              |
| Z                                                       | 1                                                                      | 1                                                                      |
| F (000)                                                 | 364.0                                                                  | 364.0                                                                  |
| Radiation $\lambda$ (Cu K $\alpha$ ) (Å)                | 1.54184                                                                | 1.54184                                                                |
| 2 Theta range (°)                                       | 12.56 to 152.04                                                        | 9.6 to 151.738                                                         |
| Limiting indices                                        | -8 $\leq$ h $\leq$ 9<br>-6 $\leq$ k $\leq$ 7<br>-22 $\leq$ l $\leq$ 22 | -9 $\leq$ h $\leq$ 9<br>-7 $\leq$ k $\leq$ 6<br>-20 $\leq$ l $\leq$ 23 |
| Reflections collected                                   | 8495                                                                   | 8058                                                                   |
| Data/restraints/parameter                               | 3967/3/459                                                             | 4021/7/461                                                             |
| GOF                                                     | 1.038                                                                  | 1.083                                                                  |
| Final R indicates [ <i>I</i> > 2 $\sigma$ ( <i>I</i> )] | R <sub>1</sub> = 0.0281<br>wR <sub>2</sub> = 0.0771                    | R <sub>1</sub> = 0.0565<br>wR <sub>2</sub> = 0.1836                    |
| R indices (all data)                                    | R <sub>1</sub> = 0.0282<br>wR <sub>2</sub> = 0.0772                    | R <sub>1</sub> = 0.0566<br>wR <sub>2</sub> = 0.1837                    |
| Largest diff peak and hole, e/ Å <sup>-3</sup>          | 0.16/-0.12                                                             | 0.30/-0.26                                                             |
| Flack parameter                                         | 0.10(7)                                                                | 0.06(14)                                                               |
| CCDC number                                             | 2102622                                                                | 2102664                                                                |

Table S3. Hydrogen bond lengths (Å) and angles (°) for *D*-1, *L*-1 and *rac*-1, respectively.

| <i>D</i> —H··· <i>A</i> | <i>D</i> —H | H··· <i>A</i> | <i>D</i> ··· <i>A</i> | <i>D</i> —H— <i>A</i> ° |
|-------------------------|-------------|---------------|-----------------------|-------------------------|
| <b><i>D</i>-1 273 K</b> |             |               |                       |                         |
| O001—H001···O00J        | 0.82        | 1.71          | 2.523(2)              | 174.5                   |
| O005—H005···O00K        | 0.82        | 2.20          | 2.882(3)              | 141.4                   |
| O006—H006···O00G        | 0.82        | 1.70          | 2.524(2)              | 176.6                   |
| O007—H007···O00K        | 0.82        | 1.80          | 2.589(2)              | 162.2                   |
| O008—H008···O00E        | 0.82        | 1.80          | 2.600(2)              | 163.2                   |
| O009—H009···O00E        | 0.82        | 2.19          | 2.883(3)              | 142.0                   |
| O00A—H00O···O00B        | 0.82        | 2.16          | 2.760(3)              | 129.9                   |
| O00F—H00M···O003        | 0.82        | 2.17          | 2.776(3)              | 131.1                   |
| O00M—H00P···O00D        | 0.82        | 2.18          | 2.886(3)              | 144.4                   |
| N00O—H00A···O00H        | 0.89        | 1.84          | 2.713(3)              | 166.6                   |
| N00O—H00B···O00A        | 0.89        | 1.94          | 2.795(3)              | 160.5                   |
| N00O—H00C···O00J        | 0.89        | 1.91          | 2.789(3)              | 168.9                   |
| N00P—H00D···O00I        | 0.89        | 1.86          | 2.730(3)              | 166.0                   |
| N00P—H00E···O00F        | 0.89        | 1.94          | 2.789(3)              | 160.1                   |
| N00P—H00F···O00G        | 0.89        | 1.90          | 2.785(3)              | 171.0                   |
| N00R—H00G···O00D        | 0.89        | 1.92          | 2.801(3)              | 168.8                   |
| N00R—H00I···O002        | 0.89        | 1.96          | 2.830(3)              | 166.2                   |
| N00S—H00J···O00C        | 0.89        | 1.89          | 2.769(3)              | 170.5                   |
| N00S—H00L···O004        | 0.89        | 1.97          | 2.842(3)              | 165.2                   |
| O004—H004···O00C        | 0.78(7)     | 2.05 (7)      | 2.602(3)              | 128(6)                  |
| O002—H002···O00D        | 0.76(8)     | 2.03 (8)      | 2.601(3)              | 132(7)                  |
| <b><i>D</i>-1 323 K</b> |             |               |                       |                         |
| O6—H6D···O1             | 0.82        | 1.78          | 2.5888(18)            | 166.8                   |
| O9—H9A···O12            | 0.82        | 2.17          | 2.784(2)              | 131.5                   |
| O10—H10···O1            | 0.82        | 2.18          | 2.884(2)              | 144.2                   |
| O11—H11A···O8           | 0.82        | 1.70          | 2.523(2)              | 175.4                   |
| N3—H3B···O4             | 0.89        | 2.00          | 2.858(2)              | 162.9                   |
| N3—H3C···O2             | 0.89        | 1.91          | 2.788(2)              | 167.8                   |
| N6—H6A···O8             | 0.89        | 1.85          | 2.722(2)              | 170.9                   |
| N6—H6B···O7             | 0.89        | 1.93          | 2.790(2)              | 166.3                   |
| N6—H6C···O9             | 0.89        | 2.00          | 2.860(2)              | 160.5                   |
| <b><i>L</i>-1 273 K</b> |             |               |                       |                         |
| O001—H001···O00K        | 0.82        | 2.17          | 2.882(3)              | 145.5                   |
| O003—H003···O00F        | 0.82        | 2.16          | 2.881(3)              | 147.2                   |
| O004—H004···O00I        | 0.82        | 2.16          | 2.771(3)              | 131.8                   |
| O006—H006···O00K        | 0.82        | 1.78          | 2.588(3)              | 167.5                   |
| O007—H007···O00E        | 0.82        | 1.71          | 2.518(3)              | 166.6                   |
| O008—H008···O00H        | 0.82        | 1.71          | 2.522(3)              | 169.5                   |
| O009—H009···O00C        | 0.82        | 2.15          | 2.757(3)              | 130.5                   |
| O00A—H00M···O00F        | 0.82        | 1.80          | 2.600(3)              | 164.0                   |

|                   |      |      |          |       |
|-------------------|------|------|----------|-------|
| O00O—H00O…O00B    | 0.82 | 2.23 | 2.889(4) | 138.2 |
| N00P—H00A…O00E    | 0.89 | 1.91 | 2.789(4) | 169.3 |
| N00P—H00B…O009    | 0.89 | 1.94 | 2.791(3) | 160.6 |
| N00P—H00C…O00G    | 0.89 | 1.86 | 2.722(3) | 162.6 |
| N00Q—H00D…O00H    | 0.89 | 1.90 | 2.786(4) | 170.6 |
| N00Q—H00E…O004    | 0.89 | 1.93 | 2.784(3) | 160.1 |
| N00Q—H00F…O00J    | 0.89 | 1.87 | 2.734(3) | 162.2 |
| N00R—H00H…O00B    | 0.86 | 1.95 | 2.796(3) | 167.1 |
| N00R—H00I…O002    | 0.86 | 1.99 | 2.835(3) | 165.1 |
| N00S—H00K…O00D    | 0.89 | 1.89 | 2.766(3) | 168.8 |
| N00S—H00L…O005    | 0.89 | 1.98 | 2.849(4) | 164.5 |
| <b>L-1 323 K</b>  |      |      |          |       |
| O5—H5A…O1         | 0.82 | 1.78 | 2.582(4) | 163.9 |
| O9—H9A…O12        | 0.82 | 2.17 | 2.772(5) | 130.3 |
| O10—H10…O1        | 0.82 | 2.15 | 2.873(5) | 147.4 |
| N3—H3A…O9         | 0.89 | 1.93 | 2.783(5) | 159.7 |
| N3—H3B…O7         | 0.89 | 1.84 | 2.723(5) | 168.6 |
| N3—H3C…O8         | 0.89 | 1.90 | 2.783(5) | 169.6 |
| N6—H6B…O2         | 0.97 | 1.82 | 2.780(5) | 171.1 |
| N6—H6C…O3         | 0.97 | 1.91 | 2.852(6) | 163.2 |
| O11—H11…O8        | 0.82 | 1.74 | 2.525(5) | 160.1 |
| <b>rac-1 273K</b> |      |      |          |       |
| O1—H1…O7          | 0.82 | 1.81 | 2.536(3) | 146.2 |
| O8—H8…O10         | 0.82 | 2.17 | 2.793(3) | 132.4 |
| O9—H9…O1          | 0.82 | 2.19 | 2.891(3) | 144.3 |
| N25—H25A…O6       | 0.89 | 1.87 | 2.745(3) | 165.2 |
| N25—H25B…O8       | 0.89 | 1.99 | 2.849(3) | 161.9 |
| N25—H25C…O7       | 0.89 | 1.91 | 2.790(3) | 169.3 |
